# Supplementary material
Source: PubMed Central journal article supplement (PMC3119122)
Supplement: supp_00404.2010_figS2.pdf [file supp_00404.2010_figS2.pdf]

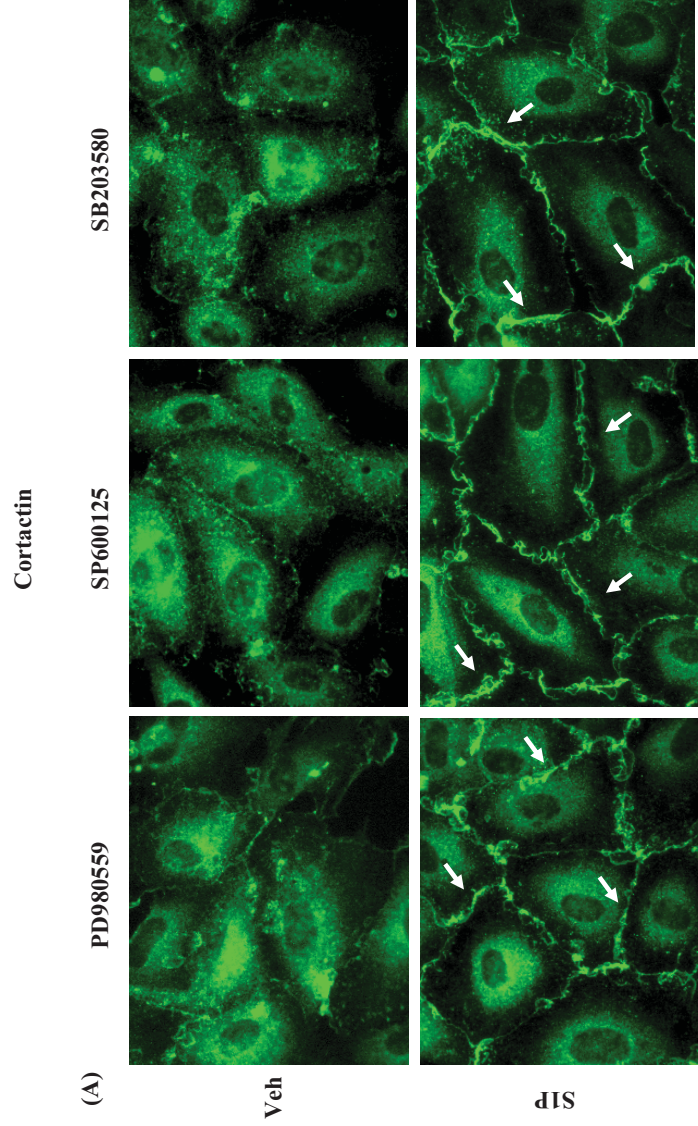

Supplemental Fig. 2 A

**VE-Cadherin**

**(B)**

**PD980559**

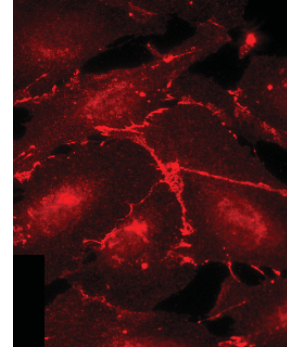

**SP600125**

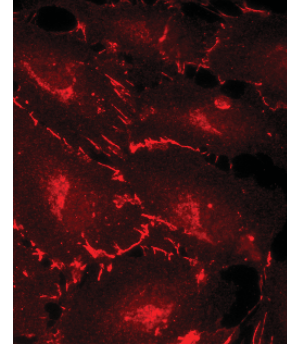

**SB203580**

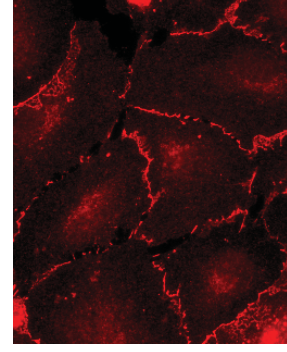

**Veh**

**SIP**

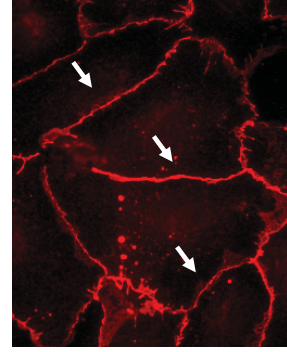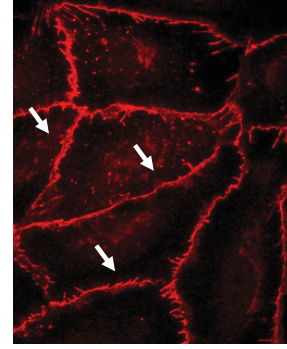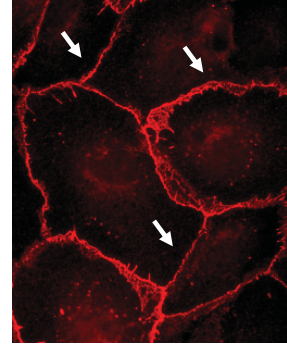

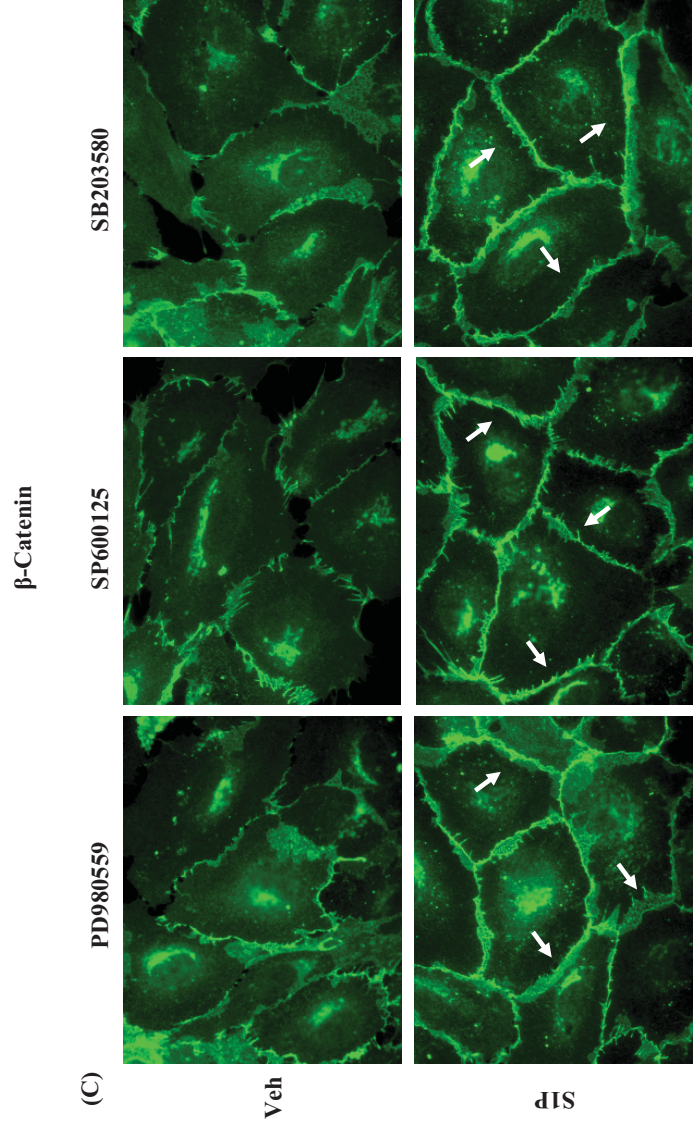

Supplemental Fig. 2 C

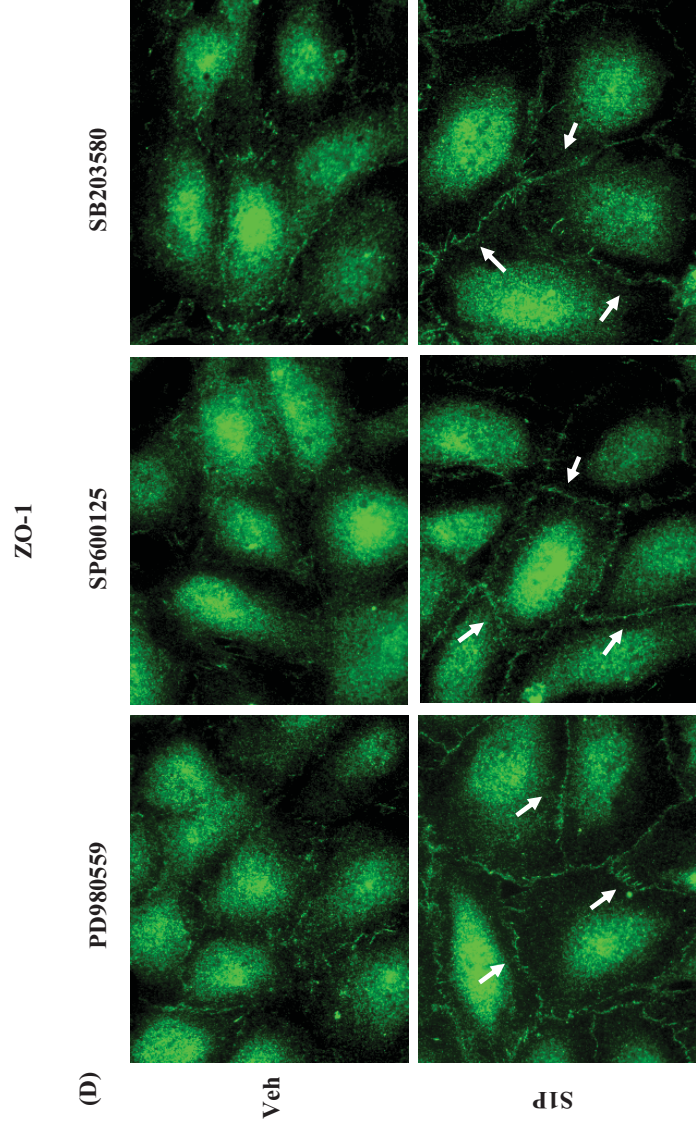

Supplemental Fig. 2 D



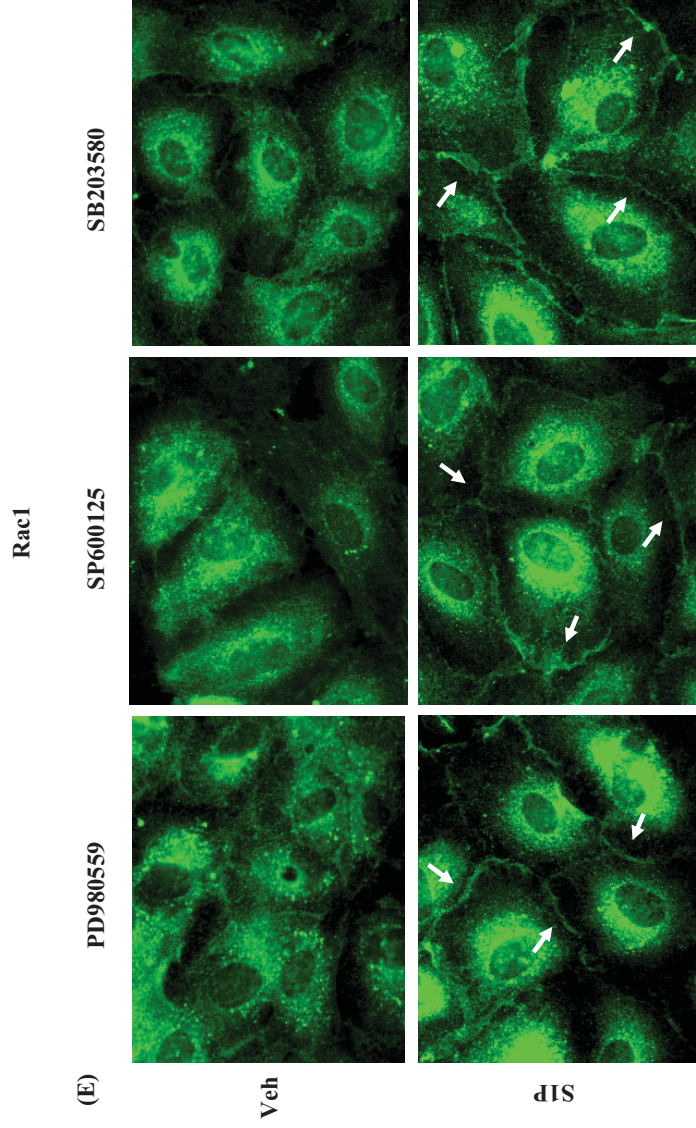

Supplemental Fig. 2 E

**IQGAP1**

**(F)**

**PD980559**

**SP600125**

**SB203580**

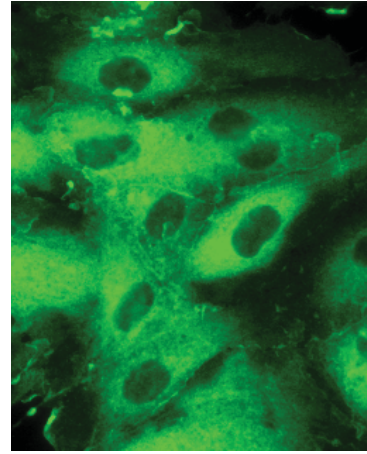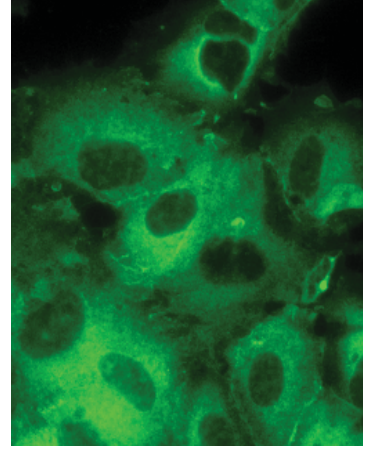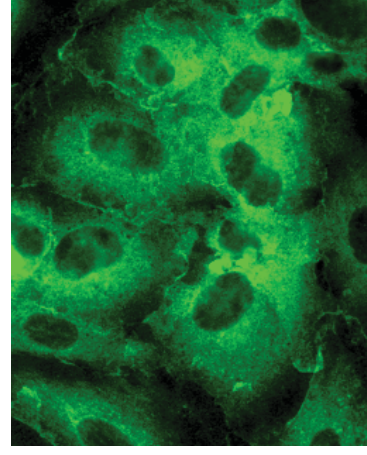

**Veh**

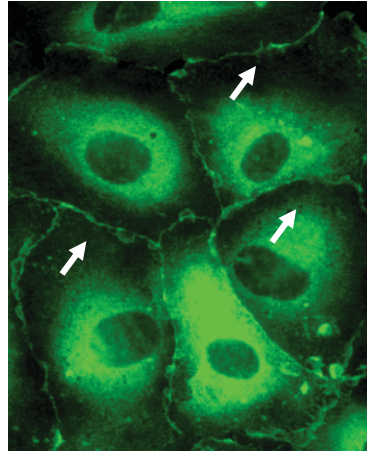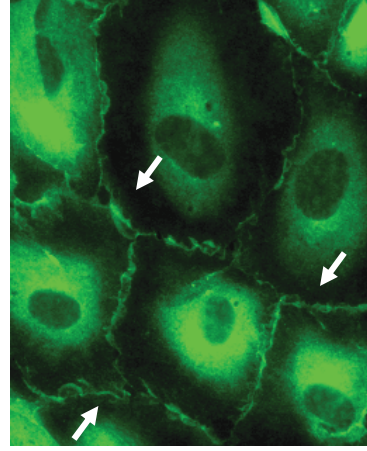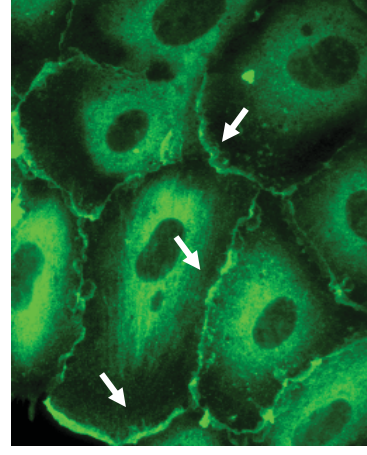

**SIP**
